# Supplementary material for: Free-Standing N-Doped Porous Carbon Fiber Membrane Derived From Zn–MOF-74: Synthesis and Application as Anode for Sodium-Ion Battery With an Excellent Performance
Source: PubMed Central journal article supplement (PMC8086192; doi:10.3389/fchem.2021.647545), 2021-04-16
Supplement: Data_Sheet_1.pdf [file Data_Sheet_1.pdf]

## *Supplementary Information*

Free-standing N-doped porous carbon fiber membrane derived from Zn-MOF-74: Synthesis and application as anode for sodium-ion battery with an excellent performance

Kaiwen Xue,<sup>1#</sup> Yechen Si,<sup>1#</sup> Shuya Xie,<sup>2,3</sup> Jingxuan Yang,<sup>2</sup> Yan Mo,<sup>1</sup> Baojun Long,<sup>1</sup> Wen Wei,<sup>1</sup> Peiyu Cao,<sup>1</sup> Huixian Wei,<sup>2</sup> Hongyu Guan,<sup>2, 3\*</sup> Elizabeth G Michaelis,<sup>4</sup> George Guo,<sup>4,5</sup> Yanfeng Yue,<sup>4\*</sup> Changsheng Shan<sup>1,2\*</sup>

<sup>1</sup>Collaborative Innovation Center for Advanced Organic Chemical Materials Co-constructed by the Province and Ministry, College of Chemistry and Chemical Engineering, Hubei University, Wuhan, Hubei 430062, P. R. China.

<sup>2</sup>Center for Advanced Analytical Science, c/o School of Chemistry and Chemical Engineering, Guangzhou University, Guangzhou, Guangdong 510006, P. R. China

<sup>3</sup>Department of Chemistry, Northeast Normal University, Changchun, Jilin 130024, P. R. China

<sup>4</sup>Department of Chemistry, Delaware State University, Dover, Delaware 19901, United States

<sup>5</sup>Dover High School, 1 Dover High Dr, Dover, DE 19904, United States

#K.Xue and Y. Si contributed equally to the work.

### **\*Correspondence:**

csshan@hubu.edu.cn (C. Shan); guanhy@gzhu.edu.cn (H. Guan); yyue@desu.edu (Y. Yue).

**Key words:** carbon fiber, metal-organic framework, sodium ion battery, heteroatom doping, porous structure, electrochemistry.

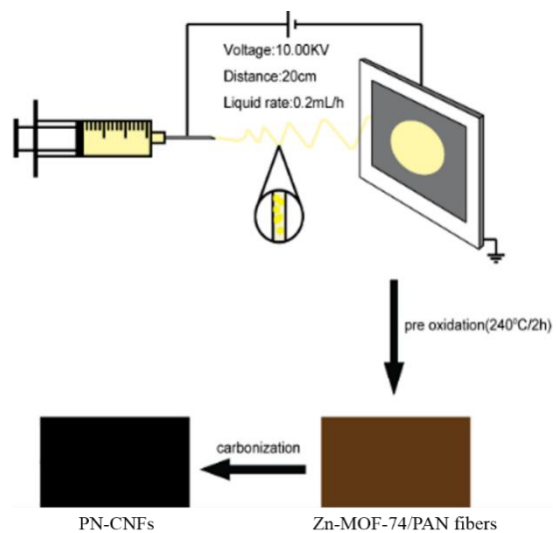

**Scheme S1.** Schematic diagram of free-standing MOF-74/PAN fibers films by electrospinning technology.

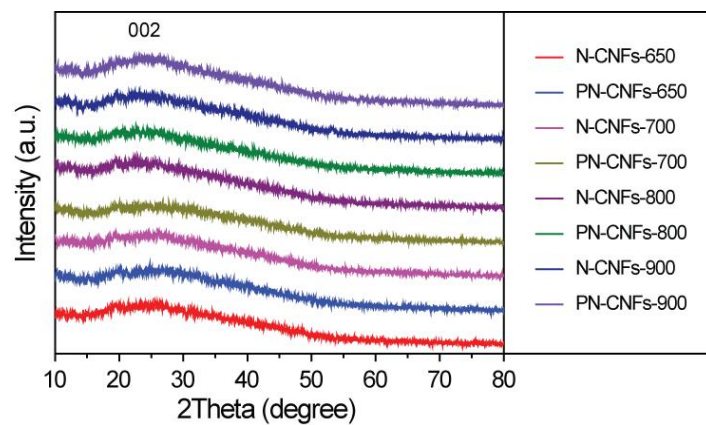

**Figure S1.** XRD patterns of N-CNFs-T and PN-CNFs-T at different pyrolysis temperature.

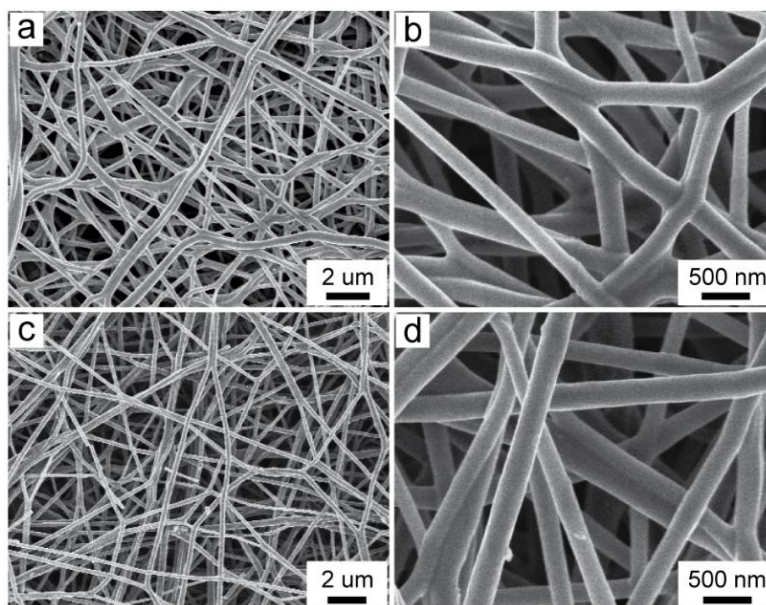

**Figure S2.** The SEM images of N-CNFs –650 (a, b) and PN-CNFs–650 (c, d)

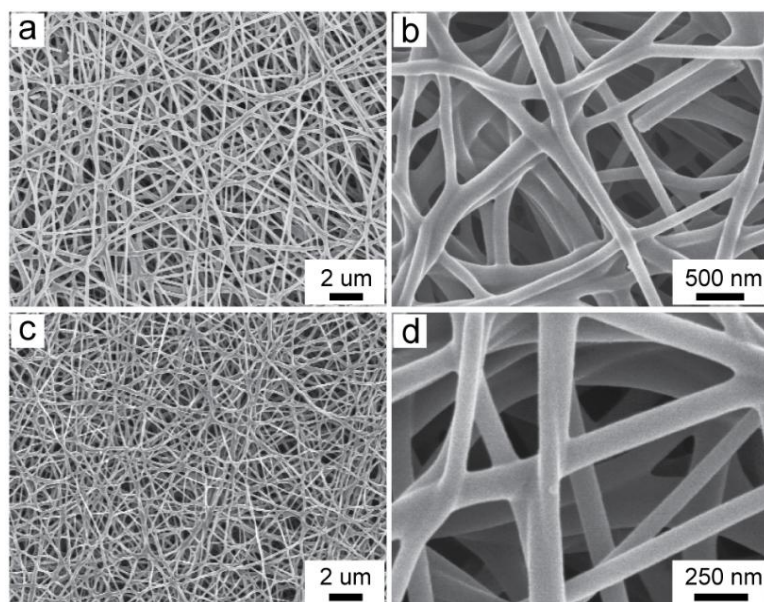

**Figure S3.** The SEM images of N-CNFs -700 (a, b) and PN-CNFs-700 (c, d)

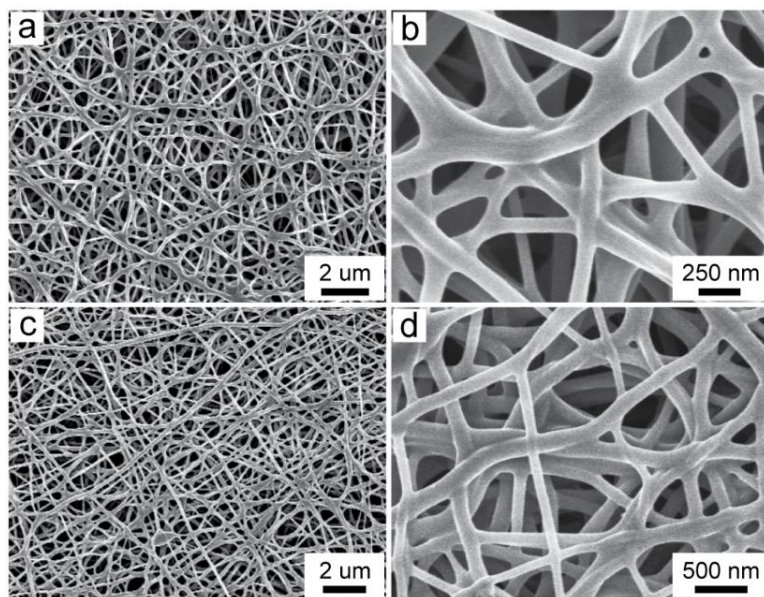

**Figure S4.** The SEM images of N-CNFs –800 (a, b) and PN-CNFs–800 (c, d)

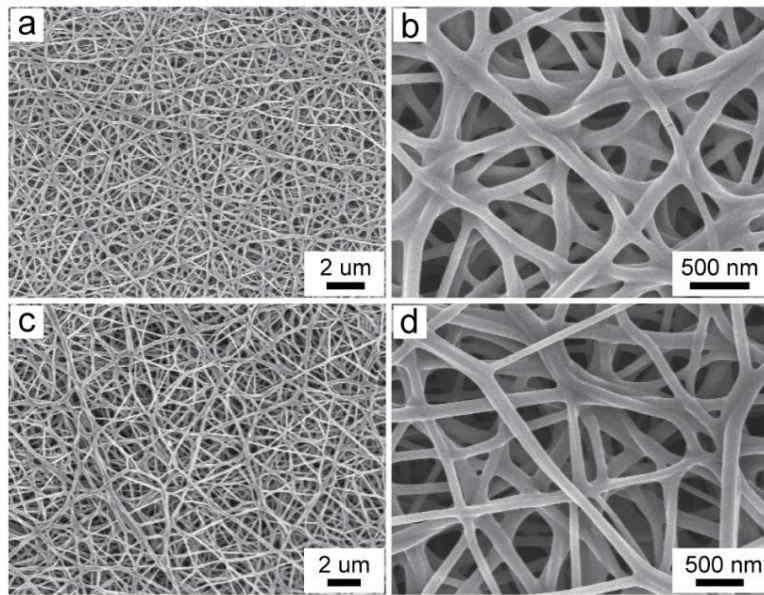

**Figure S5.** The SEM images of N-CNFs -900 (a, b) and PN-CNFs-900 (c, d)

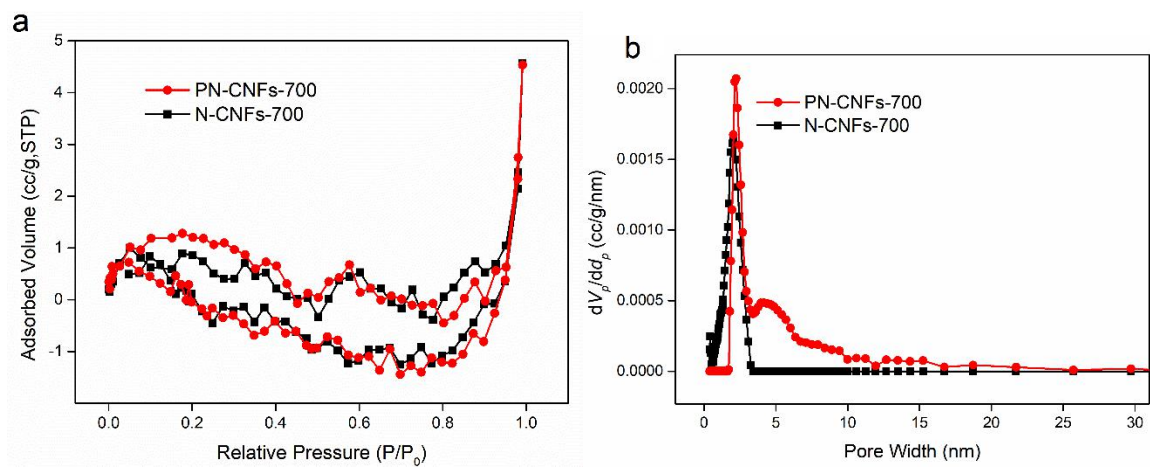

**Figure S6.** (a) Nitrogen adsorption-desorption isotherms and (b) the pore size distribution of PN-CFs and N-CFs.



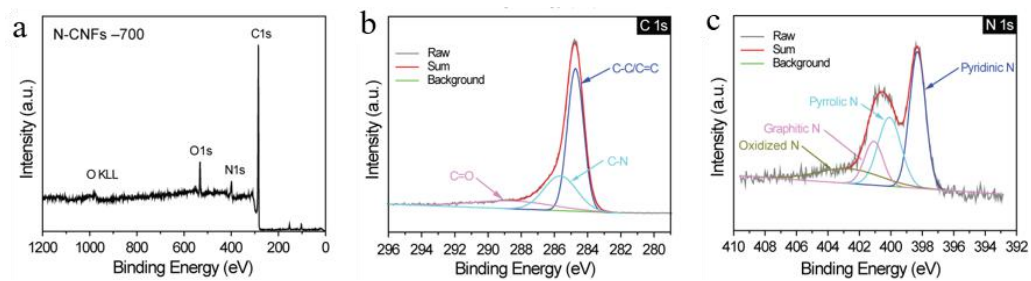

**Figure S7.** XPS survey (a) and high resolution C1s (b) and N1s (c) spectra of N-CFs-700.

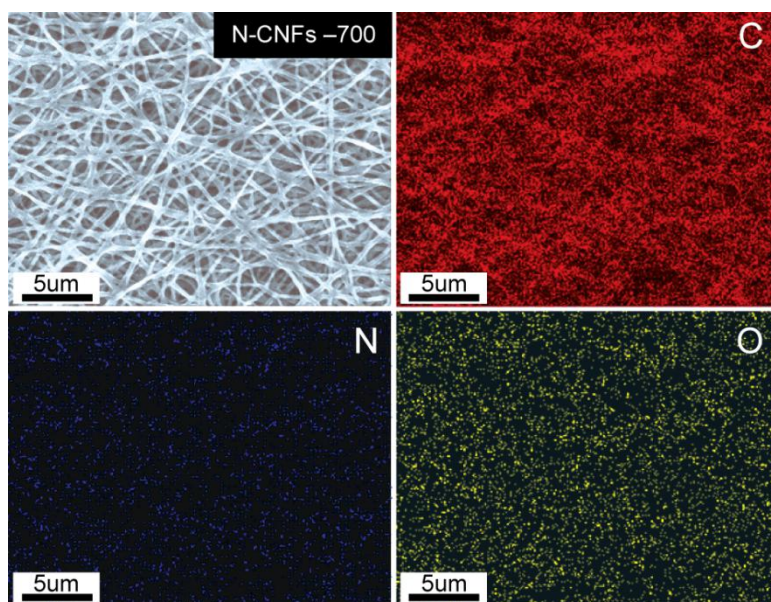

**Figure S8.** The SEM image and EDS mapping of N-CFs-700

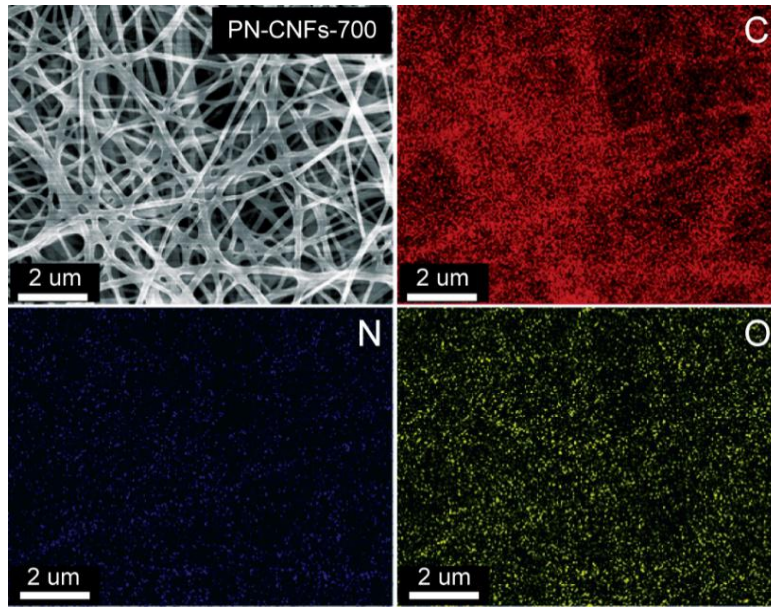

**Figure S9.** The SEM image and EDS mapping of PN-CFs-700.

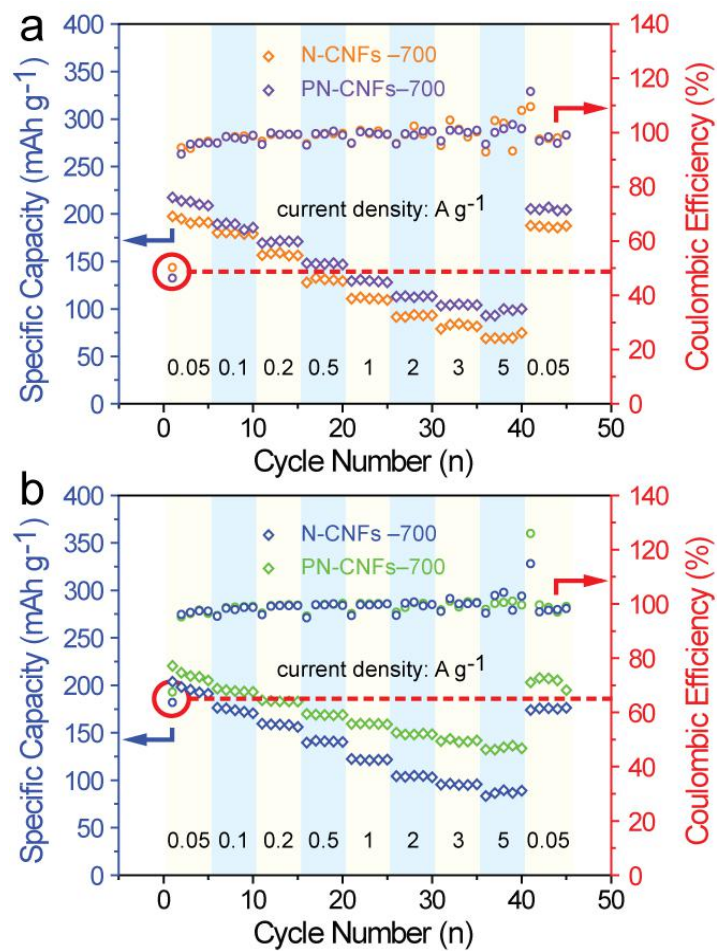

**Figure S10.** The rate performance of N-CNFs –700 and PN-CNFs–700 with of carbonates (a, EC/PC/FEC, 1 M sodium perchlorate) and ethers (b, diethylene glycol dimethyl ether, 1M trifluoromethyl sulfonate) electrolytes.

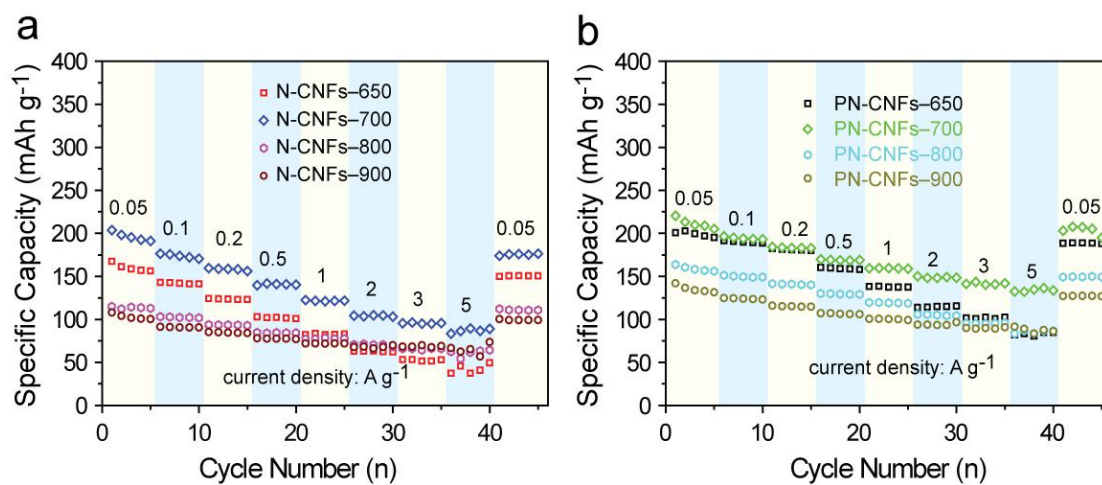

**Figure S11.** The rate performance of N-CNFs-T (a) and PN-CNFs-T (b) obtained at different carbonization temperatures from 650 °C to 900 °C.

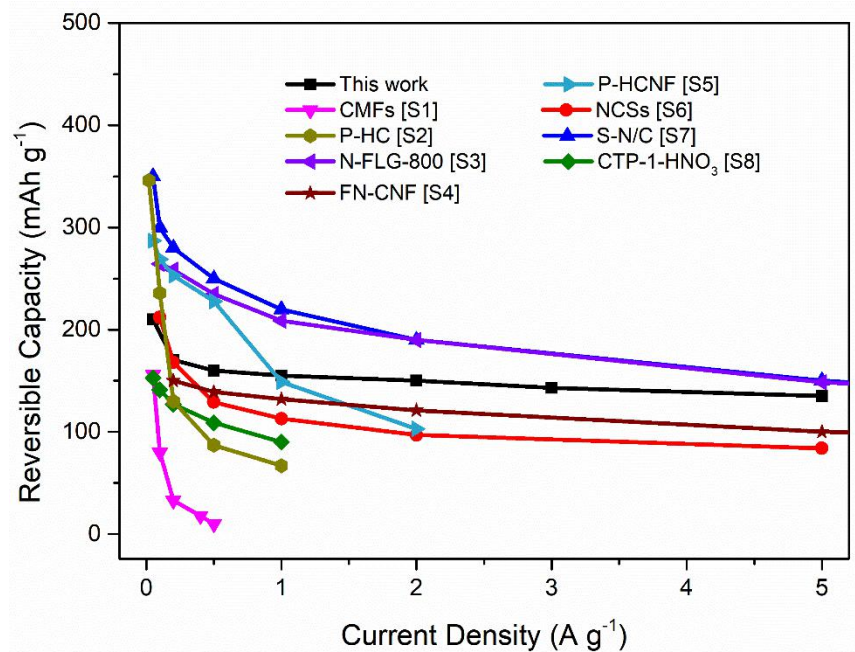

**Figure S12.** Comparison of the rate performances of PN-CFs fibers with reported carbon materials for SIBs.

## References

- [S1] Flores, D., Villarreal, J., Lopez, J., and Alcoutlabi, M. (2018). Production of carbon fibers through Forcespinning® for use as anode materials in sodium ion batteries. *Mater Sci Eng B* 236-237, 70-75. doi: 10.1016/j.mseb.2018.11.009.
- [S2] Li, Z., Ma, L., Surta, W., Bommier, C., Jian, Z., Xing, Z., et al. (2016). High Capacity of Hard Carbon Anode in Na-Ion Batteries Unlocked by POx Doping. *ACS Energy Lett.* 1. doi: 10.1021/acsenergylett.6b00172.
- [S3] Liu, J., Zhang, Y., Zhang, L., Xie, F., Vasileff, A., and Qiao, S. Z. (2019). Graphitic Carbon Nitride (g-C<sub>3</sub>N<sub>4</sub>)-Derived N-Rich Graphene with Tuneable Interlayer Distance as a High-Rate Anode for Sodium-Ion Batteries. *Adv. Mater.* 31, 1901261. doi: 10.1002/adma.201901261.
- [S4] Wang, Z., Qie, L., Yuan, L., Zhang, X., Hu, X., and Huang, Y. (2013). Functionalized N-doped interconnected carbon nanofibers as an anode material for sodium-ion storage with excellent performance. *Carbon* 55, 328-334. doi: 10.1016/j.carbon.2012.12.072.
- [S5] Wu, F., Dong, R., Bai, Y., Li, Y., Chen, G., Wang, Z. et al. (2018). Phosphorus-Doped Hard Carbon Nanofibers Prepared by Electrospinning as an Anode in Sodium-Ion Batteries. *ACS Appl. Mater. Interfaces* 10, 21335-21342. doi: 10.1021/acsami.8b05618.
- [S6] Yang, F., Zhang, Z., Du, K., Zhao, X., Chen, W., Lai, Y., et al. (2015). Dopamine derived nitrogen-doped carbon sheets as anode materials for high-performance sodium ion batteries. *Carbon* 91, 88-95. doi: 10.1016/j.carbon.2015.04.049.
- [S7] Yang, J., Zhou, X., Wu, D., Zhao, X., and Zhou, Z. (2017). S-Doped N-Rich Carbon Nanosheets with Expanded Interlayer Distance as Anode Materials for Sodium-Ion Batteries. *Adv. Mater.* 29, 1604108. doi: 10.1002/adma.201604108.
- [S8] Zhuang, Z., Cui, Y., Zhu, H., Shi, Y., and Zhuang, Q. (2018). Coal-Based Amorphous Carbon as Economical Anode Material for Sodium-Ion Battery. *J. Electrochem. Soc.* 165, A2225-A2232. doi: 10.1149/2.0981810jes.
